# Supplementary material for: Chemical Diversity and Prediction of Potential Cultivation Areas of Cistanche Herbs
Source: PubMed Central journal article supplement (PMC6930302; doi:10.1038/s41598-019-56379-x), 2019-12-24

## **Chemical Diversity and Prediction of Potential Cultivation Areas of *Cistanche* Herbs**

Ye Wang<sup>1</sup>, Li Zhang<sup>2</sup>, Zhixia Du<sup>1,3</sup>, Jin Pei<sup>3\*</sup>, Linfang Huang<sup>1\*</sup>

<sup>1</sup> Institute of Medicinal Plant Development, Chinese Academy of Medical Sciences, Peking Union Medical College, Engineering Research Center of Chinese Medicine Resource, Ministry of Education, Key Research Laboratory of Traditional Chinese Medicine Resources Protection, Administration of Traditional Chinese Medicine, National Administration of Traditional Chinese Medicine, Beijing 100193, China

<sup>2</sup> College of Science, Sichuan Agricultural University, Ya'an 625000, China

<sup>3</sup> College Pharmacy, Chengdu University of Traditional Chinese Medicine, Chengdu 611137, China

**\*Corresponding authors:**

Jin Pei: peixjin@163.com

Linfang Huang: linfanghuang416@163.com and lfhuang@implad.ac.cn

Table S1 Important variables based on percent contribution and permutation contribution in *C. deserticola*.

| Variable | Percent contribution | Permutation importance | Variable | Percent contribution | Permutation importance |
|----------|----------------------|------------------------|----------|----------------------|------------------------|
| bio02    | 0.2                  | 0.5                    | srad11   | 0.1                  | 2.2                    |
| bio08    | 0                    | 1.6                    | srad12   | 0.1                  | 0                      |
| bio09    | 8.2                  | 23.2                   | tavg03   | 6.6                  | 0                      |
| bio12    | 0                    | 0.3                    | tavg05   | 1.5                  | 0.4                    |
| bio14    | 0.1                  | 0.1                    | tmax01   | 0.5                  | 29.7                   |
| bio15    | 0.1                  | 0                      | tmax02   | 10                   | 18.3                   |
| bio16    | 2.8                  | 0.1                    | tmax03   | 0.1                  | 0.1                    |
| bio19    | 7.6                  | 0                      | tmax04   | 0.1                  | 0                      |
| pre01    | 11.6                 | 0.6                    | tmax05   | 0.3                  | 0                      |
| pre03    | 0.8                  | 0.7                    | tmax11   | 0.1                  | 3.2                    |
| pre05    | 1.1                  | 1.4                    | tmax12   | 12.6                 | 0                      |
| pre06    | 1.5                  | 0                      | tmin04   | 0                    | 0.1                    |
| pre07    | 0.1                  | 0                      | tmin11   | 0.6                  | 0                      |
| pre09    | 4                    | 0                      | vapr04   | 0.5                  | 2.6                    |
| pre10    | 0.4                  | 0                      | vapr07   | 0.3                  | 1.6                    |
| srad02   | 0                    | 0.3                    | vapr08   | 0.1                  | 0.4                    |
| srad03   | 0                    | 0.1                    | vapr12   | 0.1                  | 0                      |
| srad05   | 0.4                  | 3.5                    | wind01   | 6.3                  | 3.3                    |
| srad08   | 13.2                 | 4.8                    | wind10   | 0.5                  | 1.1                    |
| srad09   | 7.5                  | 0                      |          |                      |                        |

Table S2 Important variables based on percent contribution and permutation contribution in *C. tubulosa*.

| Variable | Percent contribution | Permutation importance | Variable | Percent contribution | Permutation importance |
|----------|----------------------|------------------------|----------|----------------------|------------------------|
| bio03    | 0                    | 1                      | srad05   | 20.6                 | 0                      |
| bio05    | 0.1                  | 0.5                    | srad06   | 3.3                  | 2.1                    |
| bio16    | 1.5                  | 5.3                    | srad09   | 4.1                  | 0                      |
| bio17    | 0.5                  | 0.2                    | tavg06   | 0.7                  | 0.5                    |
| pre01    | 2.4                  | 4.8                    | tavg07   | 1.3                  | 0                      |
| pre02    | 0.9                  | 0                      | tmax06   | 0.1                  | 0.1                    |
| pre03    | 0.2                  | 0                      | tmin09   | 0.2                  | 0                      |
| pre04    | 0.9                  | 4.6                    | vapr01   | 0.2                  | 0                      |
| pre05    | 1                    | 1.9                    | vapr06   | 0.6                  | 17.8                   |
| pre07    | 0.3                  | 0                      | vapr07   | 0.9                  | 0                      |
| pre08    | 14.9                 | 50                     | vapr08   | 13.4                 | 0                      |
| pre09    | 20.9                 | 1.4                    | vapr09   | 1.9                  | 0                      |
| pre10    | 5.1                  | 6.8                    | wind07   | 0.2                  | 2.9                    |
| pre11    | 0.5                  | 0                      | wind10   | 2.2                  | 0                      |
| srad01   | 1                    | 0                      |          |                      |                        |

Table S3 Important variables based on percent contribution and permutation contribution in *C. salsa*.

| Variable | Percent contribution | Permutation importance | Variable | Percent contribution | Permutation importance |
|----------|----------------------|------------------------|----------|----------------------|------------------------|
| bio08    | 0.1                  | 0.7                    | srad06   | 0.8                  | 0.3                    |
| bio09    | 2.5                  | 6.3                    | srad07   | 0.1                  | 0                      |
| bio12    | 1.2                  | 2                      | srad08   | 12.1                 | 3.2                    |
| bio15    | 0.3                  | 0                      | srad09   | 2.2                  | 0.6                    |
| bio16    | 5.1                  | 0.9                    | srad11   | 0.2                  | 0                      |
| bio19    | 11.2                 | 0                      | srad12   | 2.8                  | 0                      |
| pre01    | 10.9                 | 2.3                    | tavg03   | 3.4                  | 0                      |
| pre02    | 0.7                  | 1                      | tmax01   | 3.5                  | 0.2                    |
| pre03    | 1                    | 0.2                    | tmax02   | 29.3                 | 63.2                   |
| pre04    | 0                    | 0.2                    | tmax11   | 0.1                  | 0                      |
| pre05    | 1.8                  | 0.1                    | tmin04   | 0.3                  | 14.3                   |
| pre06    | 0.3                  | 0                      | vapr07   | 0.2                  | 0                      |
| pre09    | 1.1                  | 0                      | vapr08   | 0.1                  | 1.4                    |
| pre11    | 2.6                  | 0.2                    | wind01   | 4.6                  | 0.1                    |
| pre12    | 0.6                  | 0.6                    | wind02   | 0.1                  | 0.1                    |
| srad04   | 0.2                  | 0.9                    | wind10   | 0.6                  | 1.4                    |

Table S4 Important variables based on percent contribution and permutation contribution in *C. sinensis*.

| Variable | Percent contribution | Permutation importance | Variable | Percent contribution | Permutation importance |
|----------|----------------------|------------------------|----------|----------------------|------------------------|
| bio03    | 0.1                  | 1.7                    | tavg06   | 0.1                  | 0                      |
| bio14    | 5.4                  | 0                      | tavg08   | 0.9                  | 0                      |
| bio17    | 0                    | 0                      | tavg11   | 2.6                  | 0                      |
| bio19    | 23.3                 | 0                      | tmax02   | 26                   | 0                      |
| pre01    | 0.3                  | 0                      | tmax04   | 0.3                  | 23.9                   |
| pre02    | 0.1                  | 0                      | tmax10   | 0.1                  | 0                      |
| pre04    | 0.5                  | 0                      | tmax11   | 0.2                  | 11.7                   |
| pre05    | 0.2                  | 0                      | tmin04   | 0.3                  | 0                      |
| pre06    | 3.4                  | 0                      | tmin06   | 0.1                  | 15                     |
| pre09    | 1.5                  | 0.3                    | tmin10   | 0.7                  | 0                      |
| pre10    | 7.1                  | 0.2                    | vapr01   | 0                    | 1.8                    |
| pre12    | 15.5                 | 0.2                    | vapr04   | 0.3                  | 25.2                   |
| srad03   | 0.9                  | 8.6                    | vapr05   | 0.4                  | 0                      |
| srad04   | 1.7                  | 0                      | vapr06   | 0.1                  | 0                      |
| srad08   | 2.9                  | 2.1                    | vapr07   | 0.3                  | 0                      |
| srad12   | 3.7                  | 0                      | vapr12   | 0.2                  | 0                      |
| tavg03   | 0.5                  | 0                      | wind08   | 0.1                  | 5.9                    |
| tavg04   | 0.1                  | 3.4                    |          |                      |                        |

Figure S1 Results of the jackknife test in *C. deserticola* model.

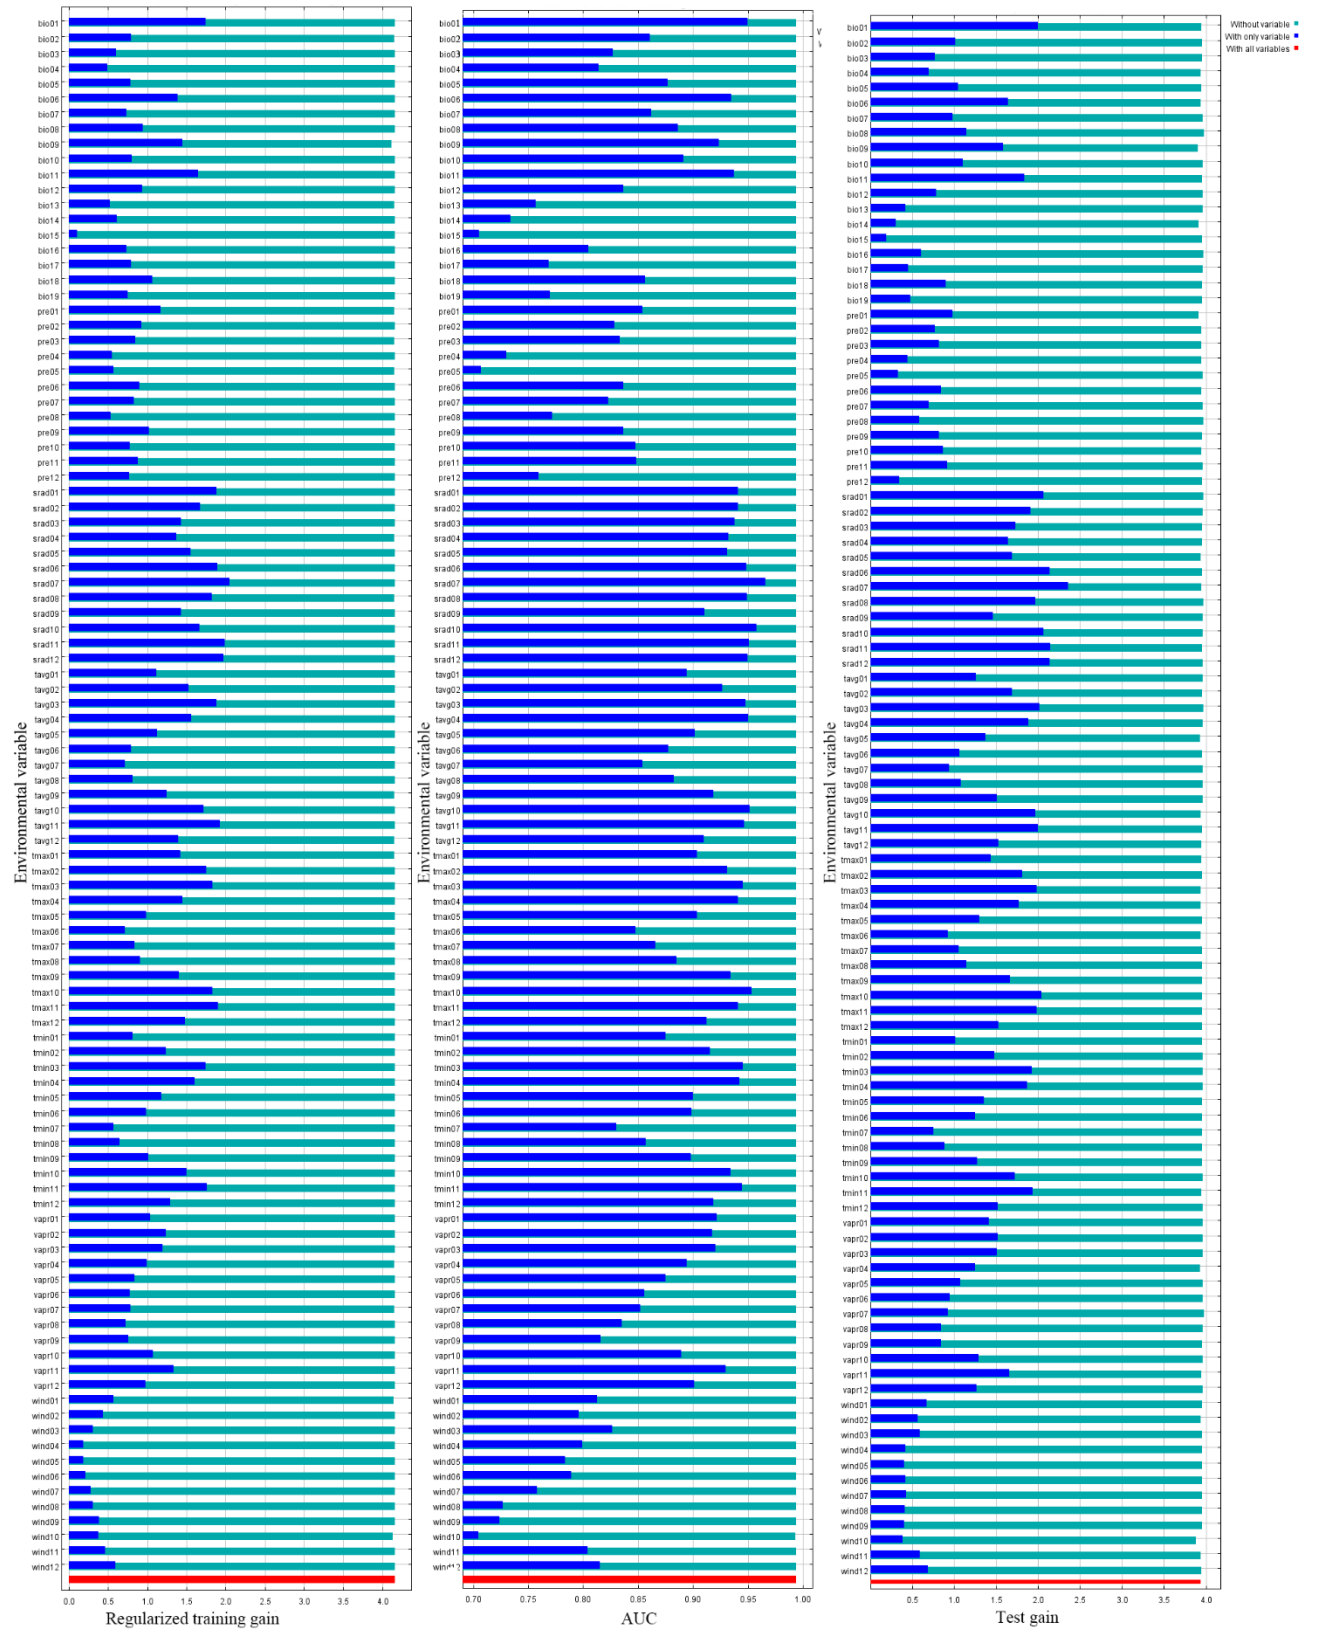

Figure S2 Results of the jackknife test in *C. tubulosa* model.

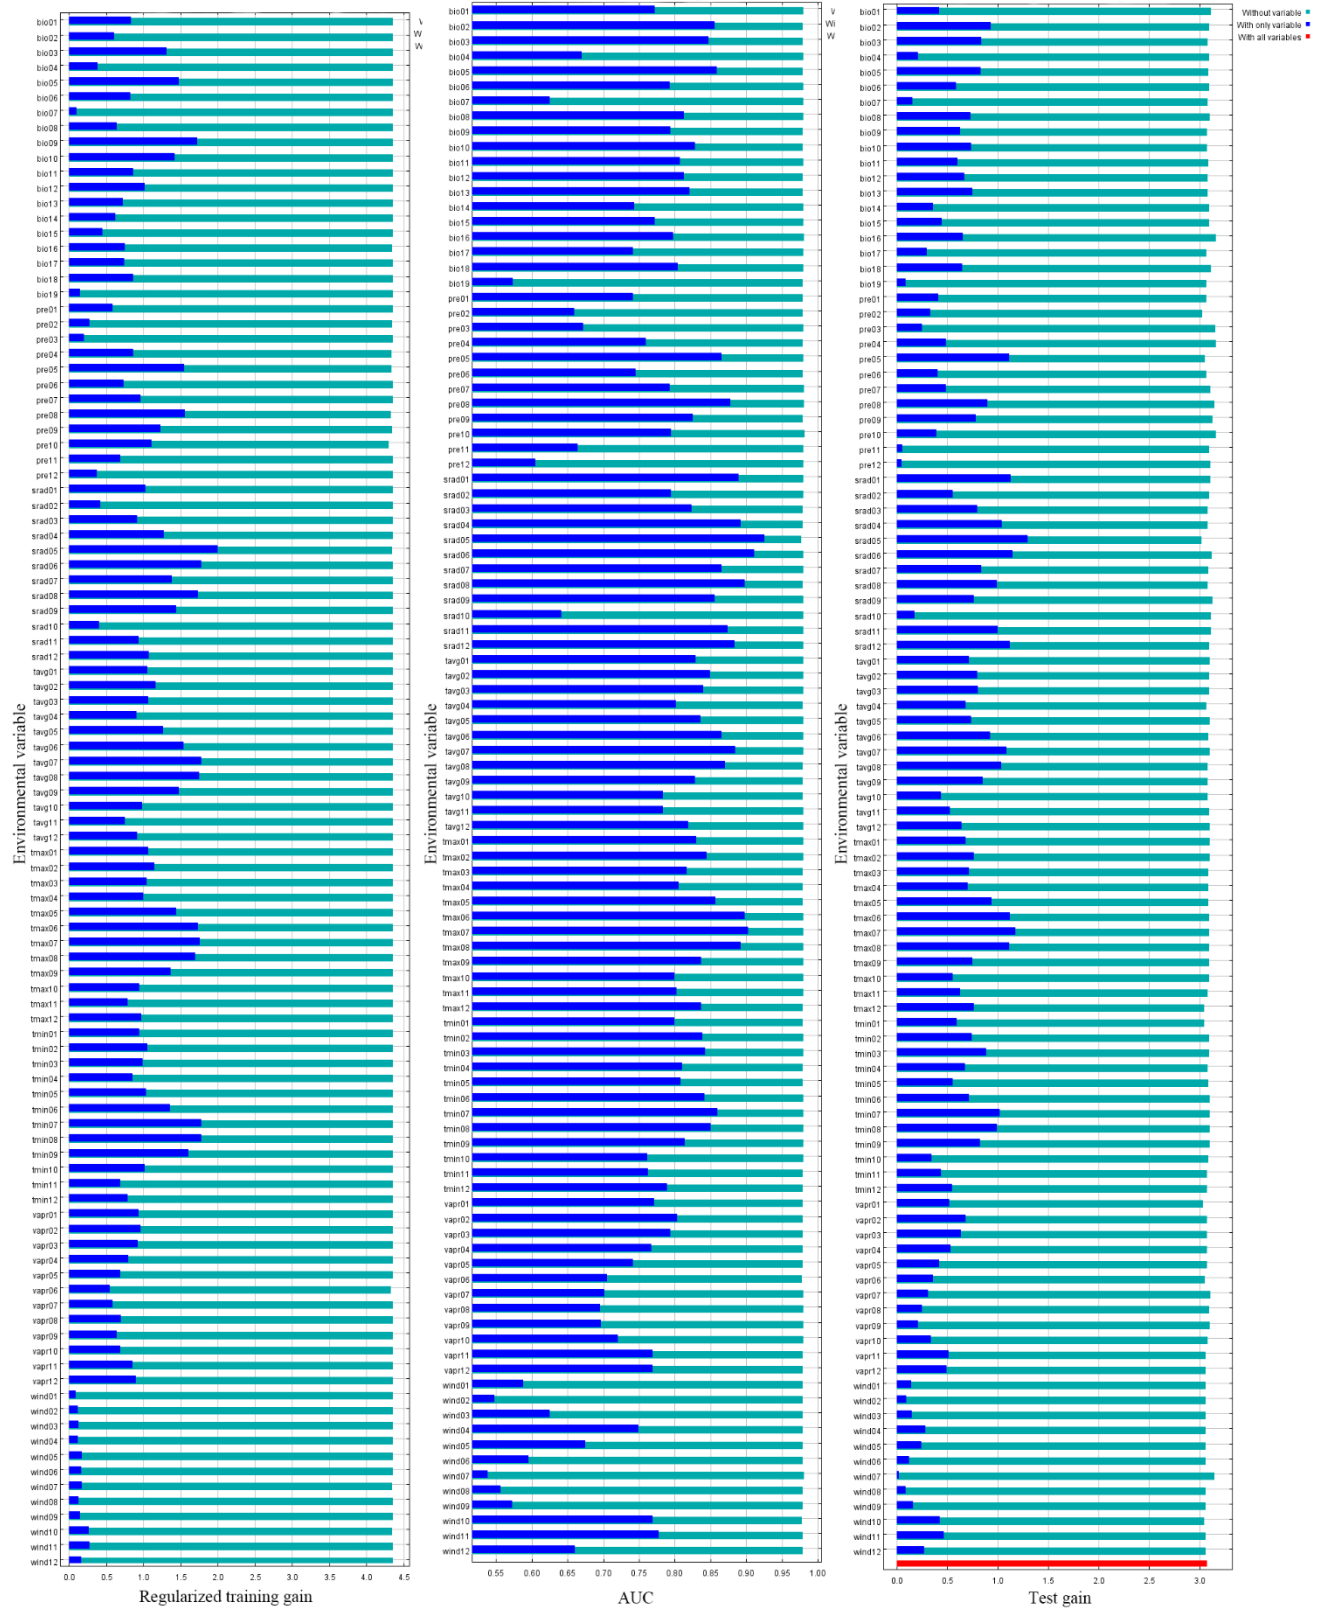

Figure S3 Results of the jackknife test in *C. salsa* model.

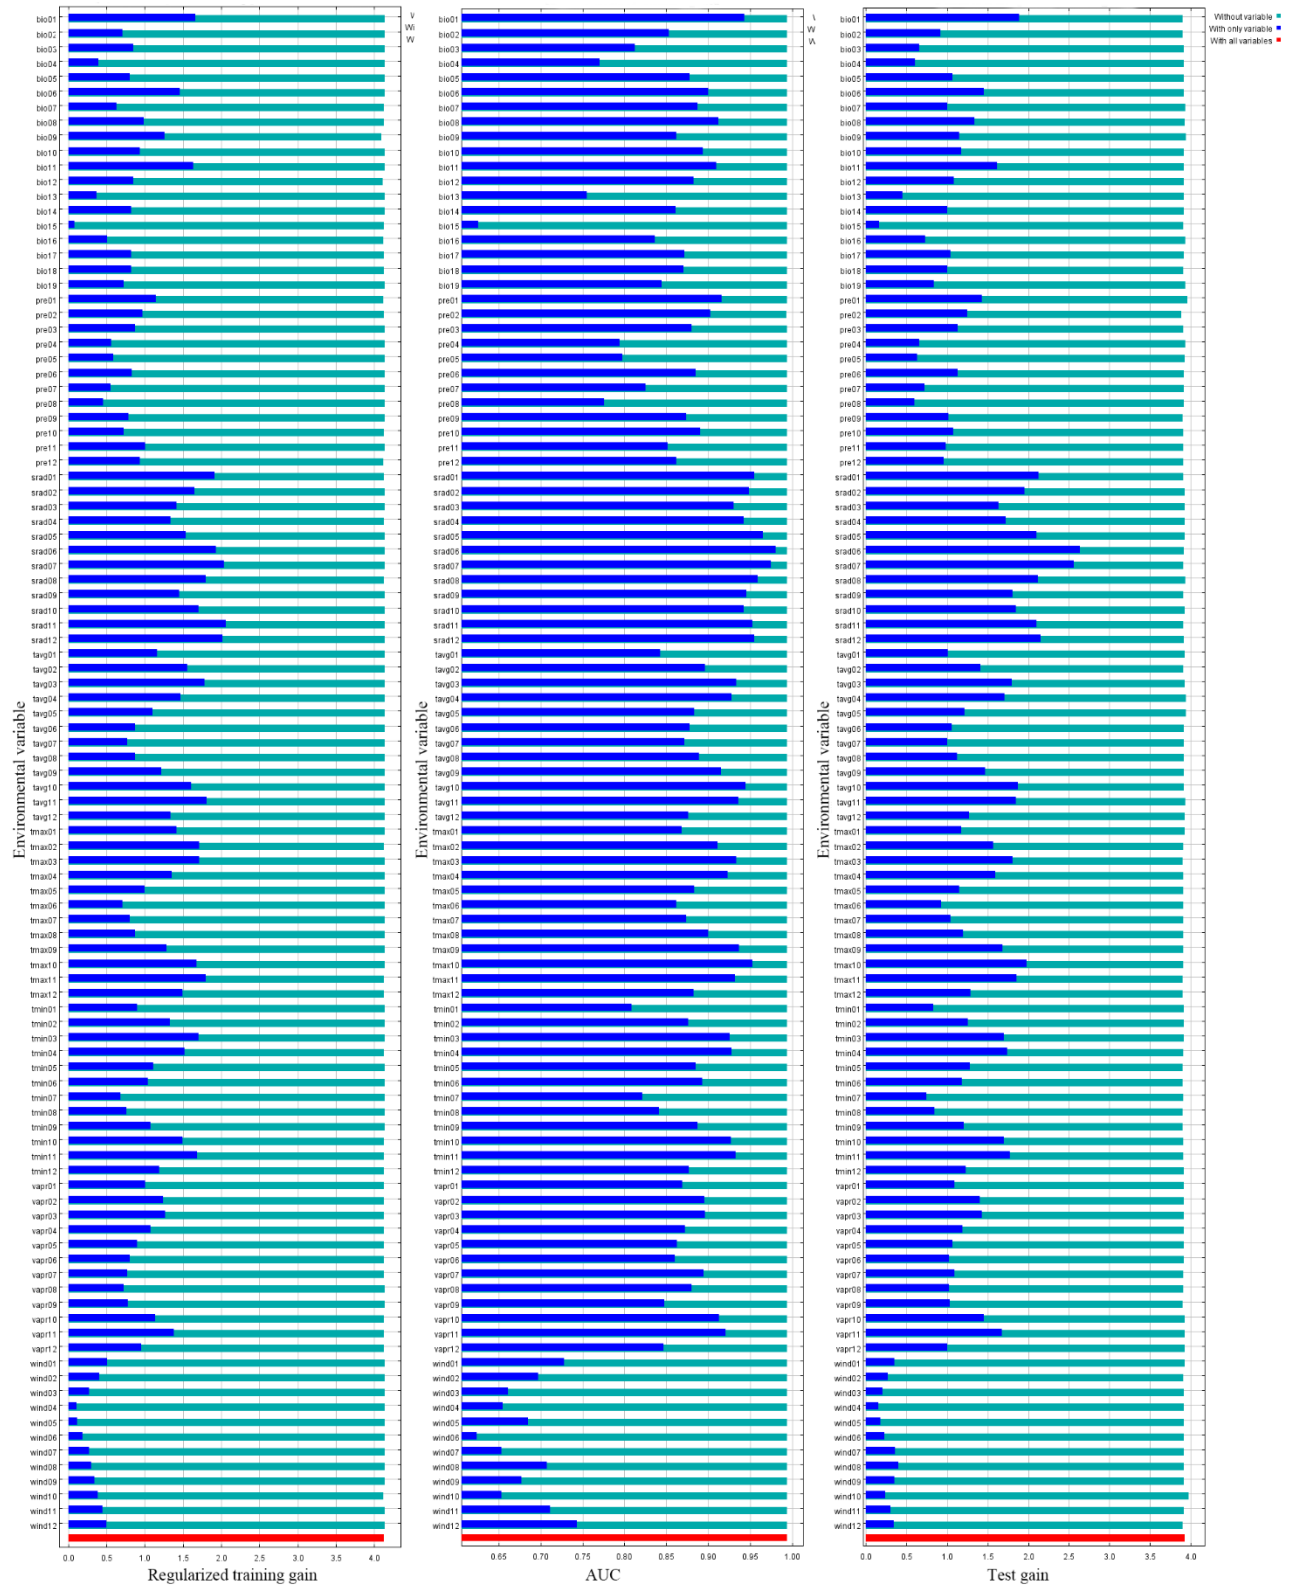



Figure S4 Results of the jackknife test in *C. sinensis* model.

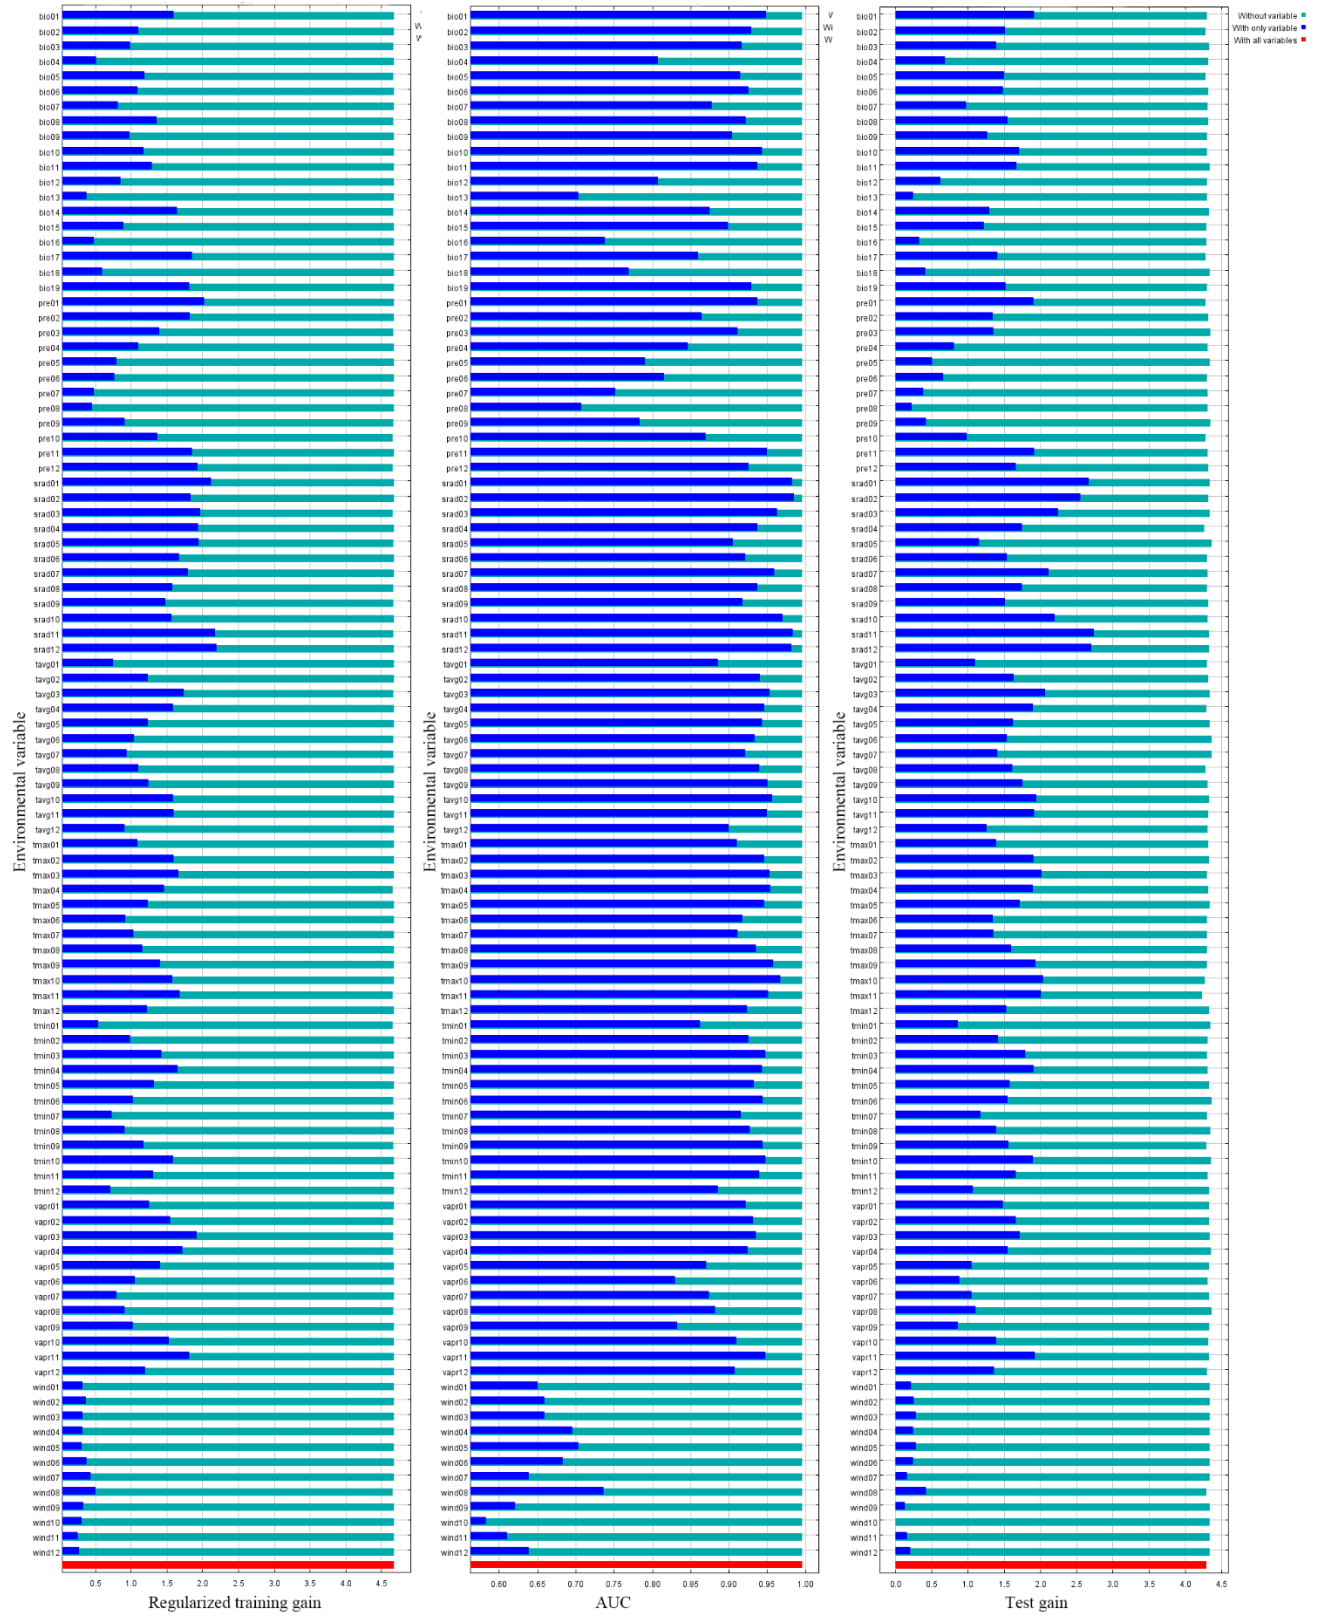

Figure S5 Variables' response results to suitability for *C. deserticola*.

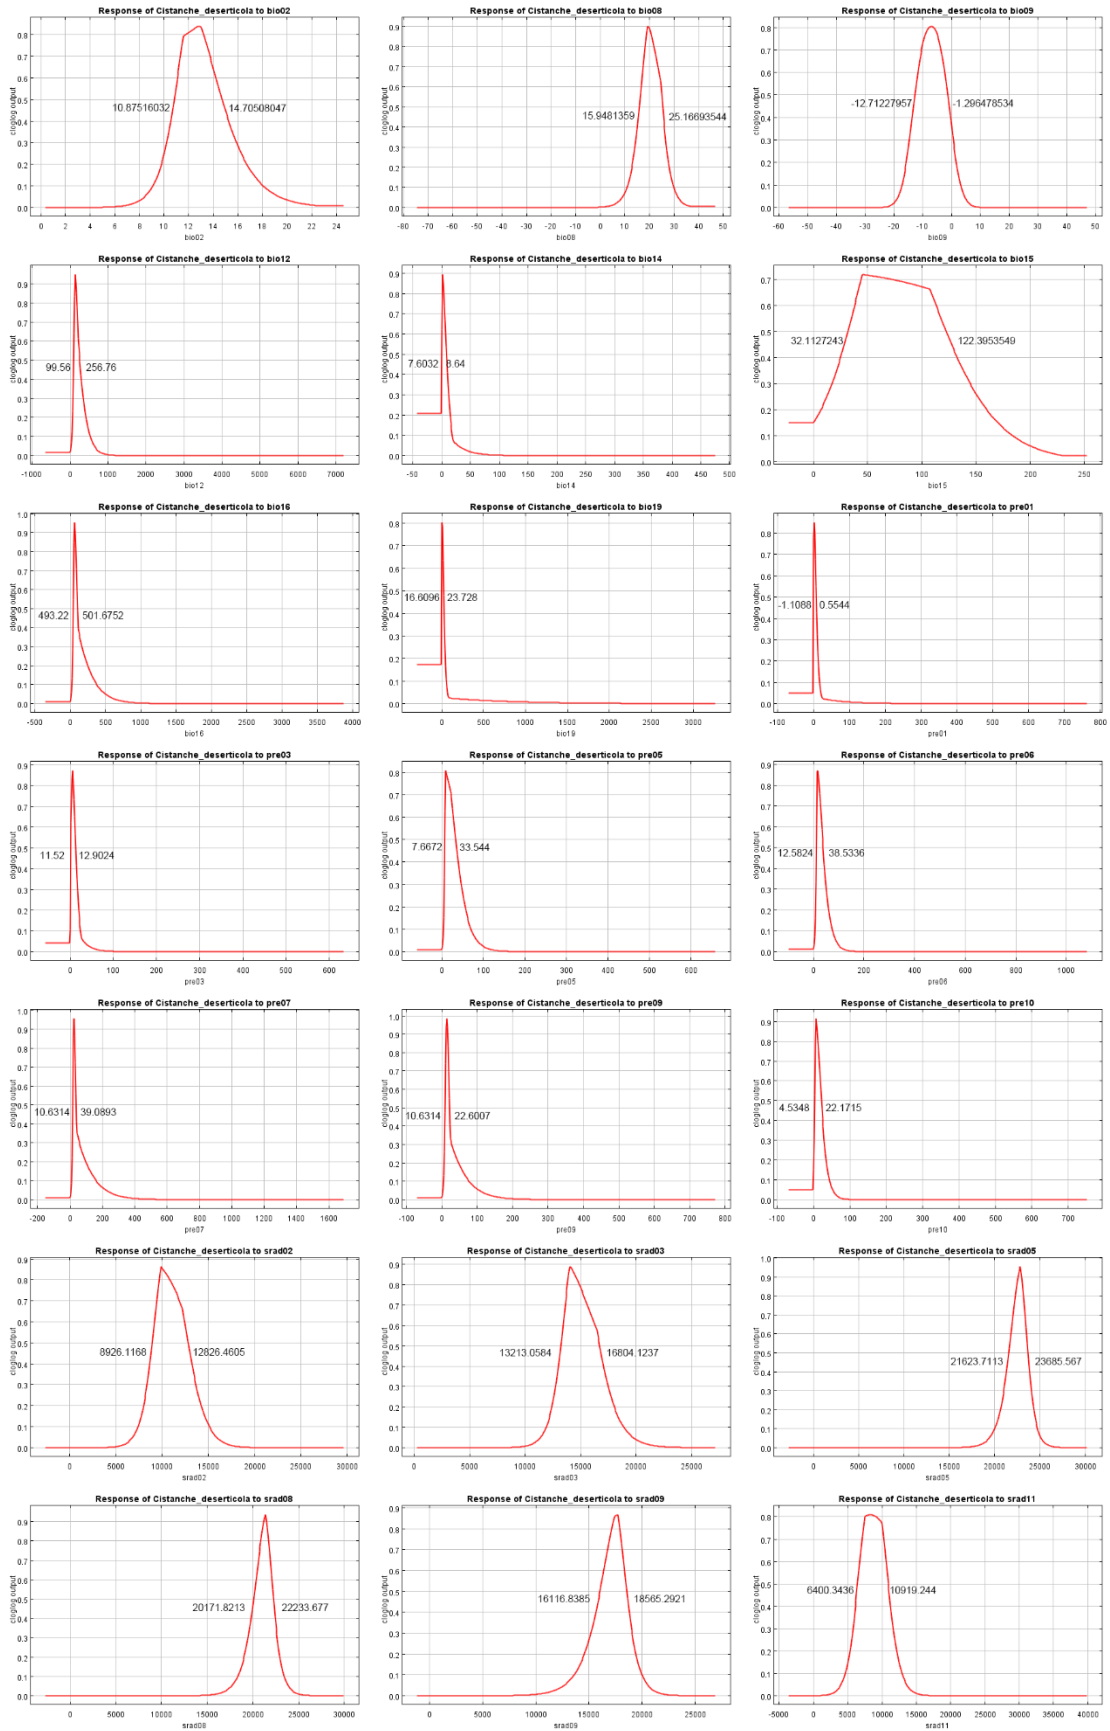

Figure S5 Continued...

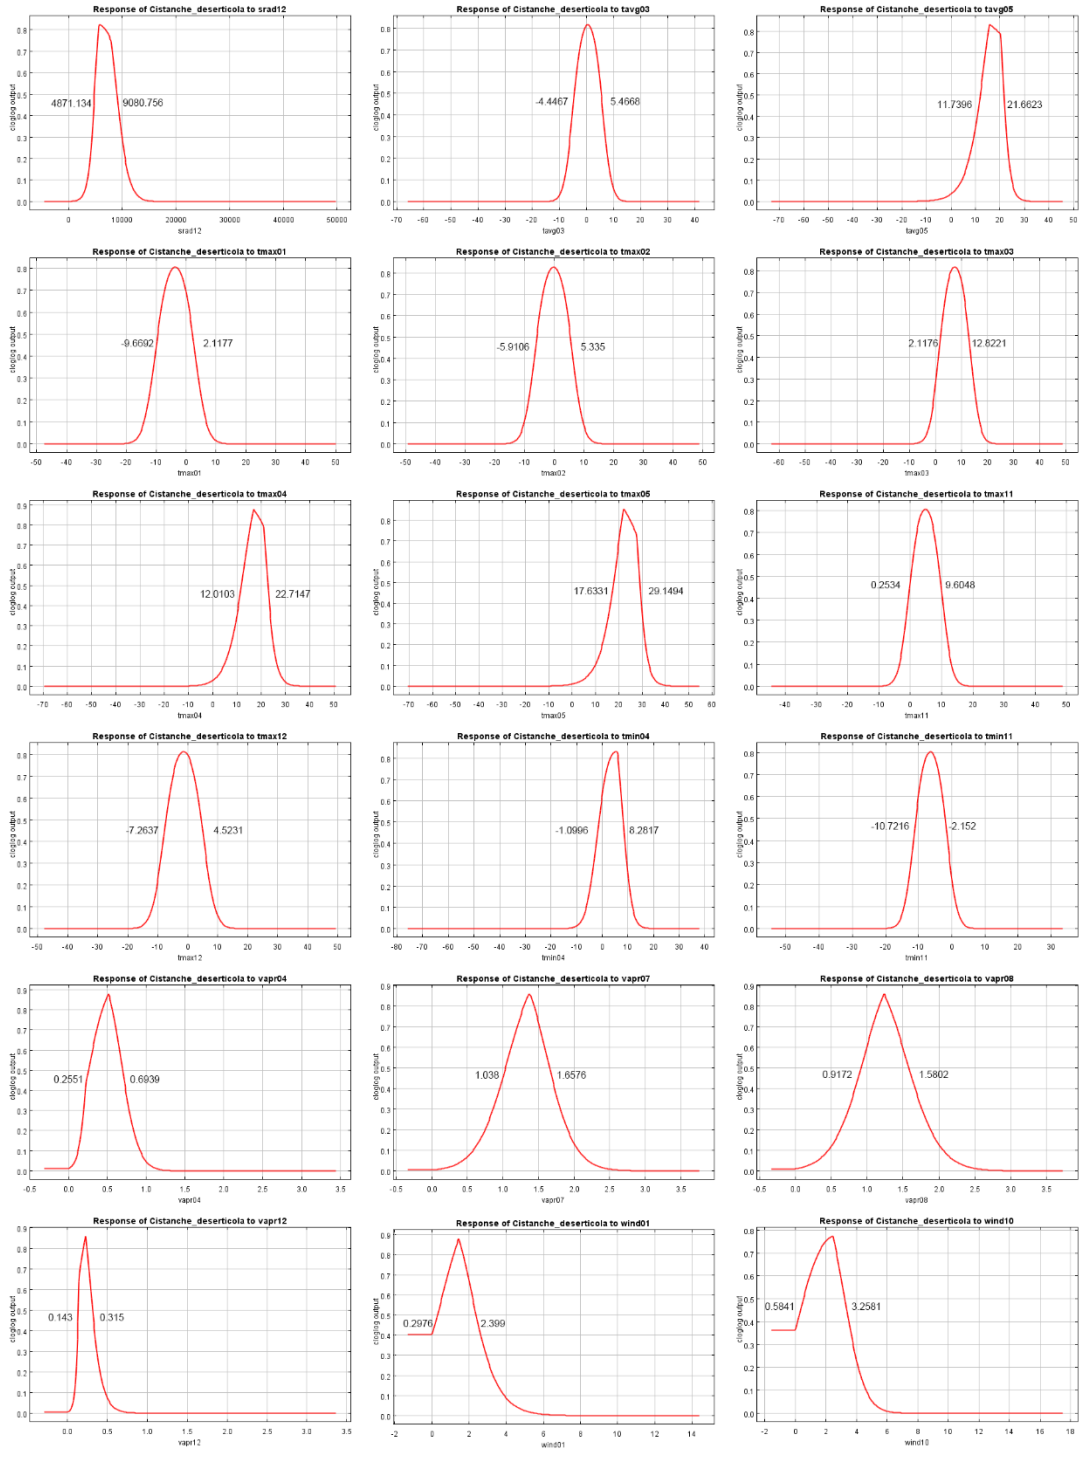

Figure S6 Variables' response results to suitability for *C. tubulosa*.

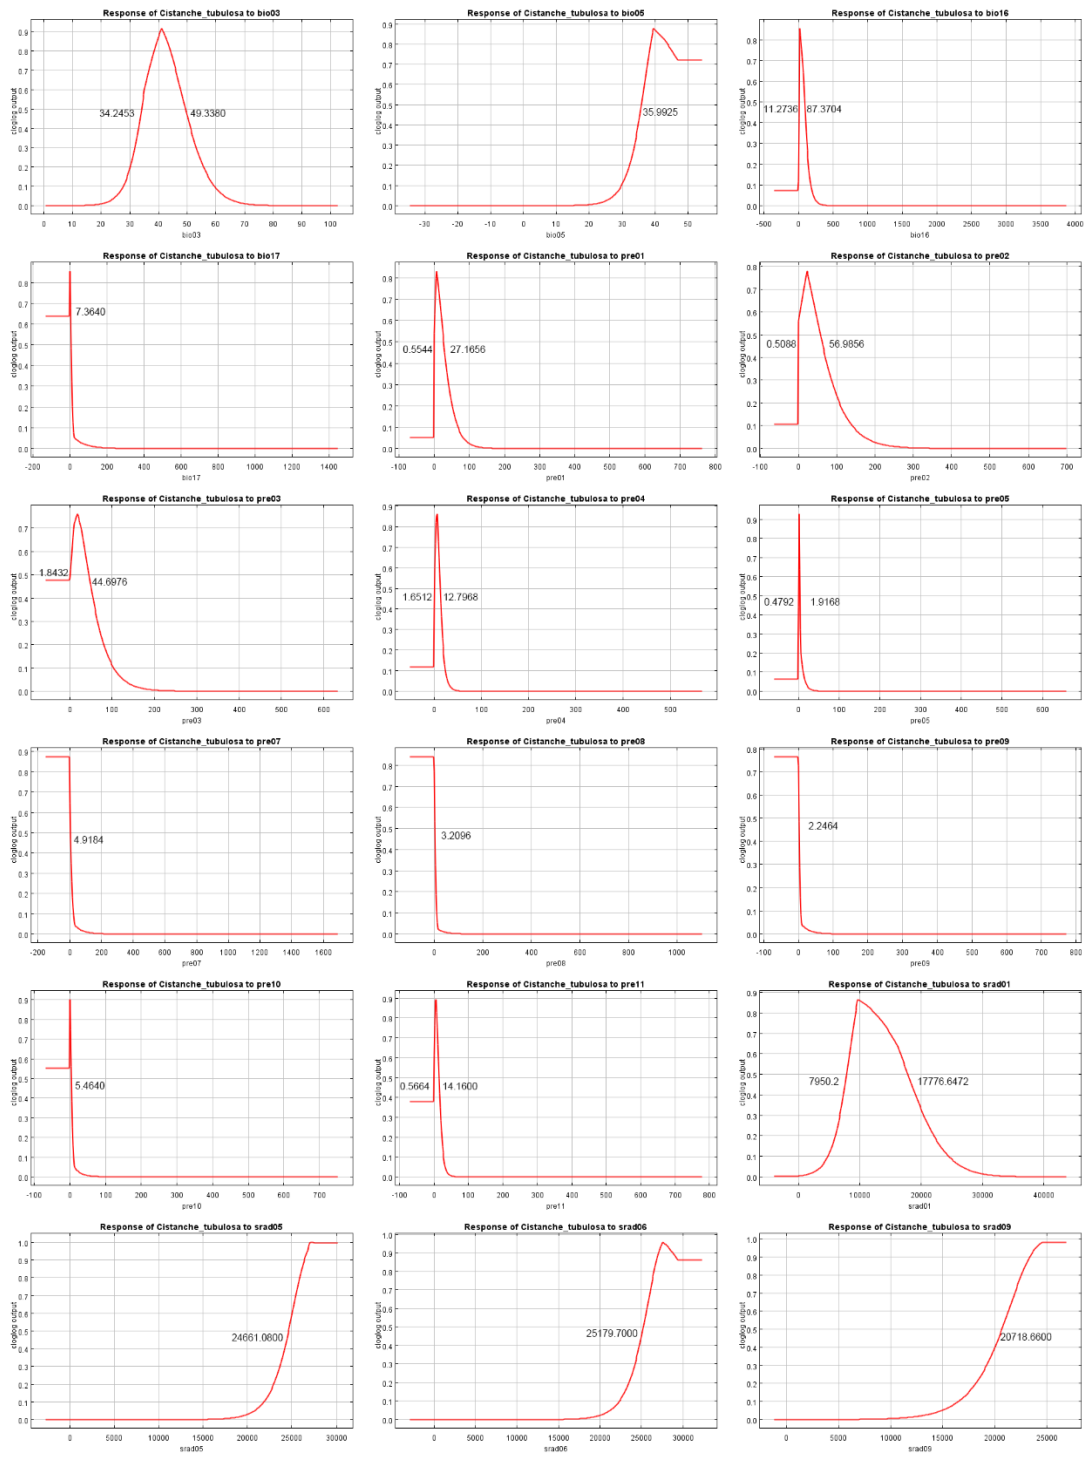

Figure S6 Continue...

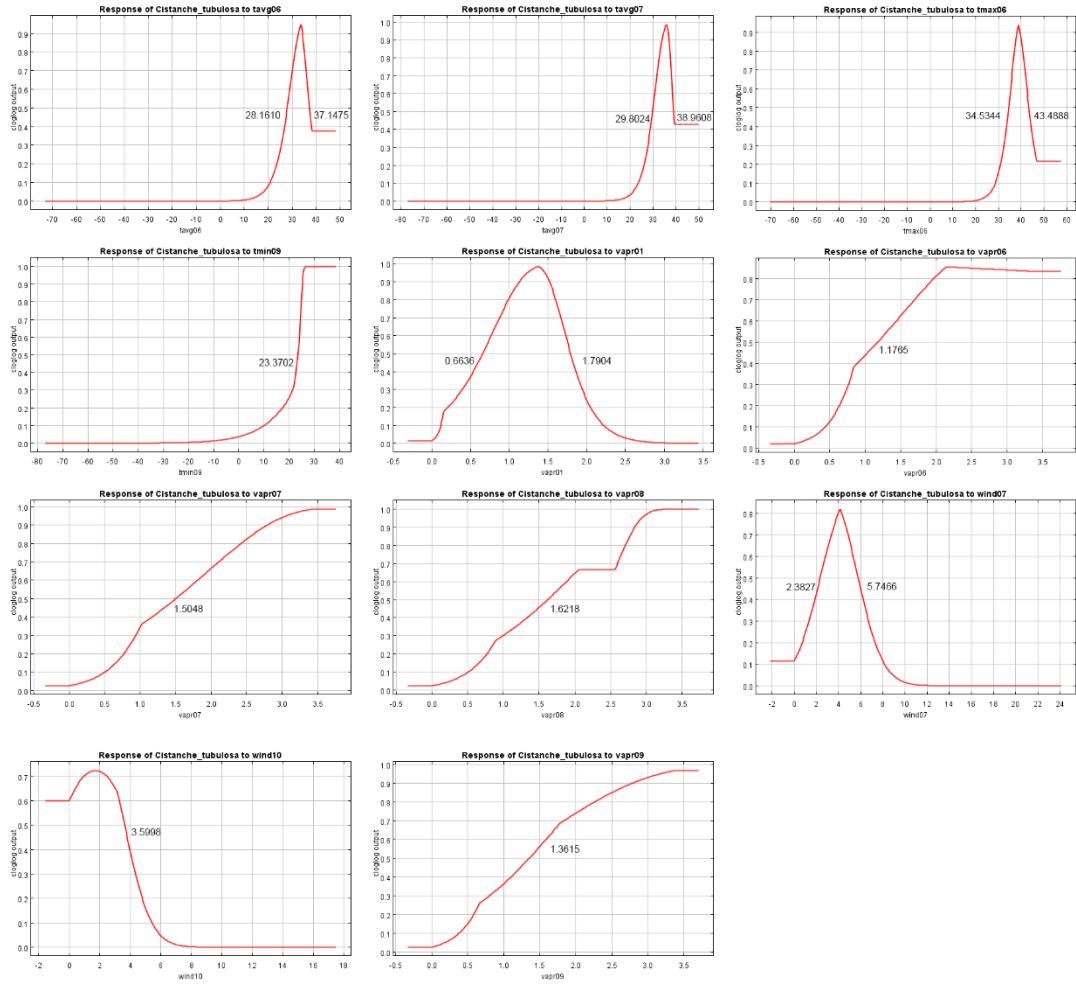

Figure S7 Variables' response results to suitability for *C. salsa*.

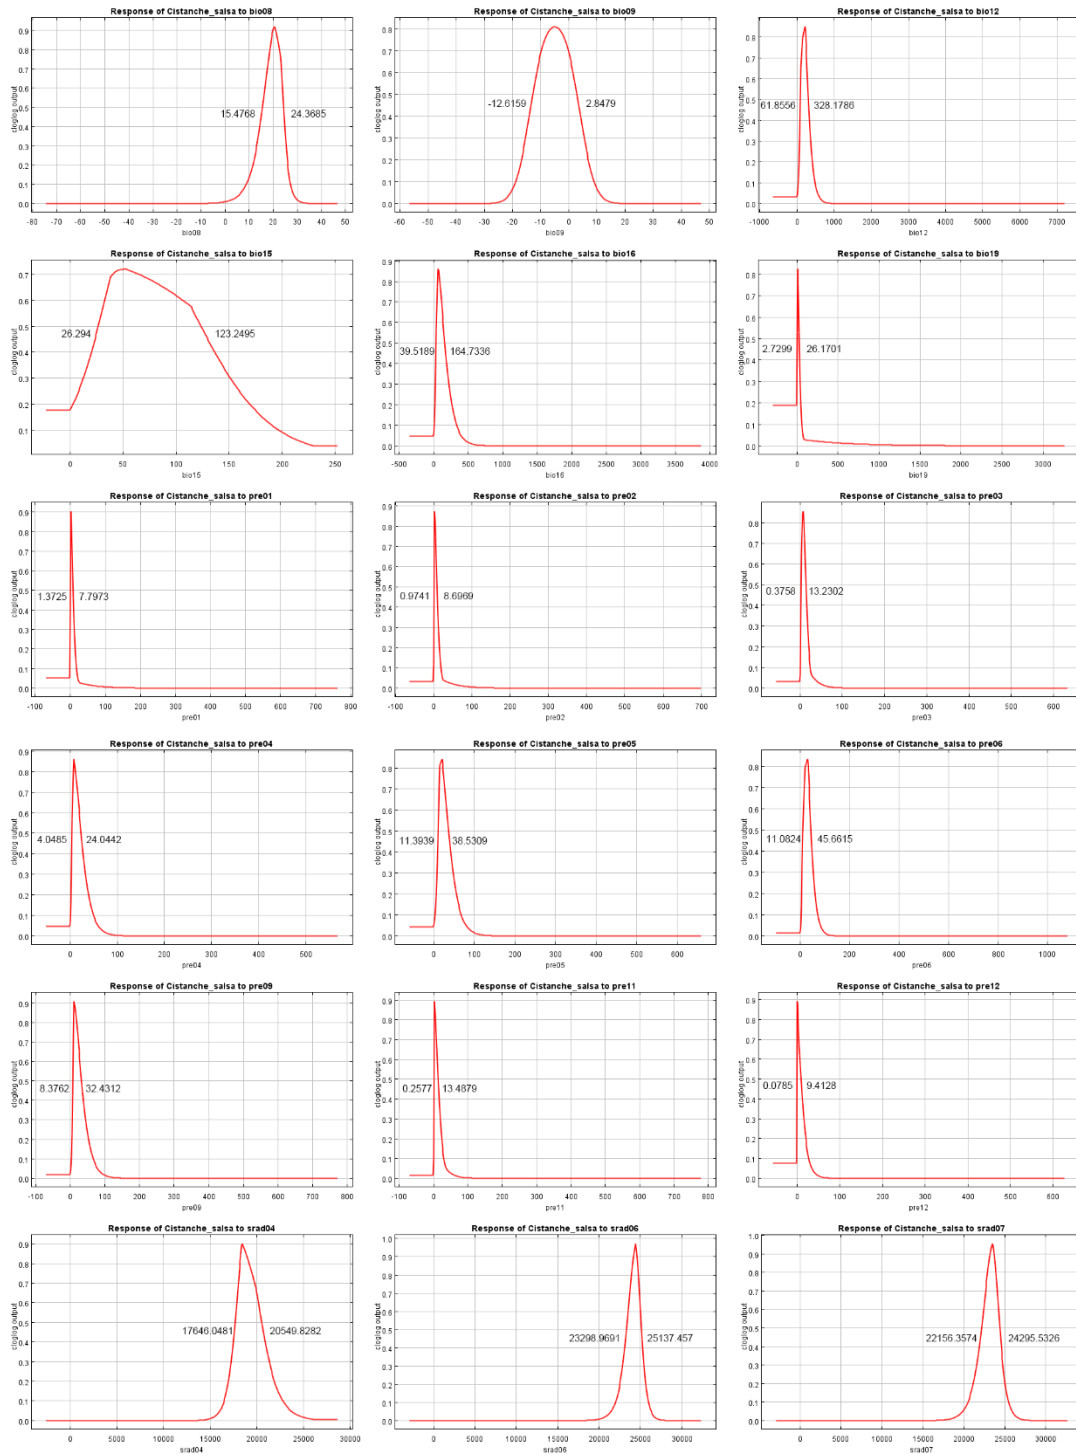

Figure S7 Continued...

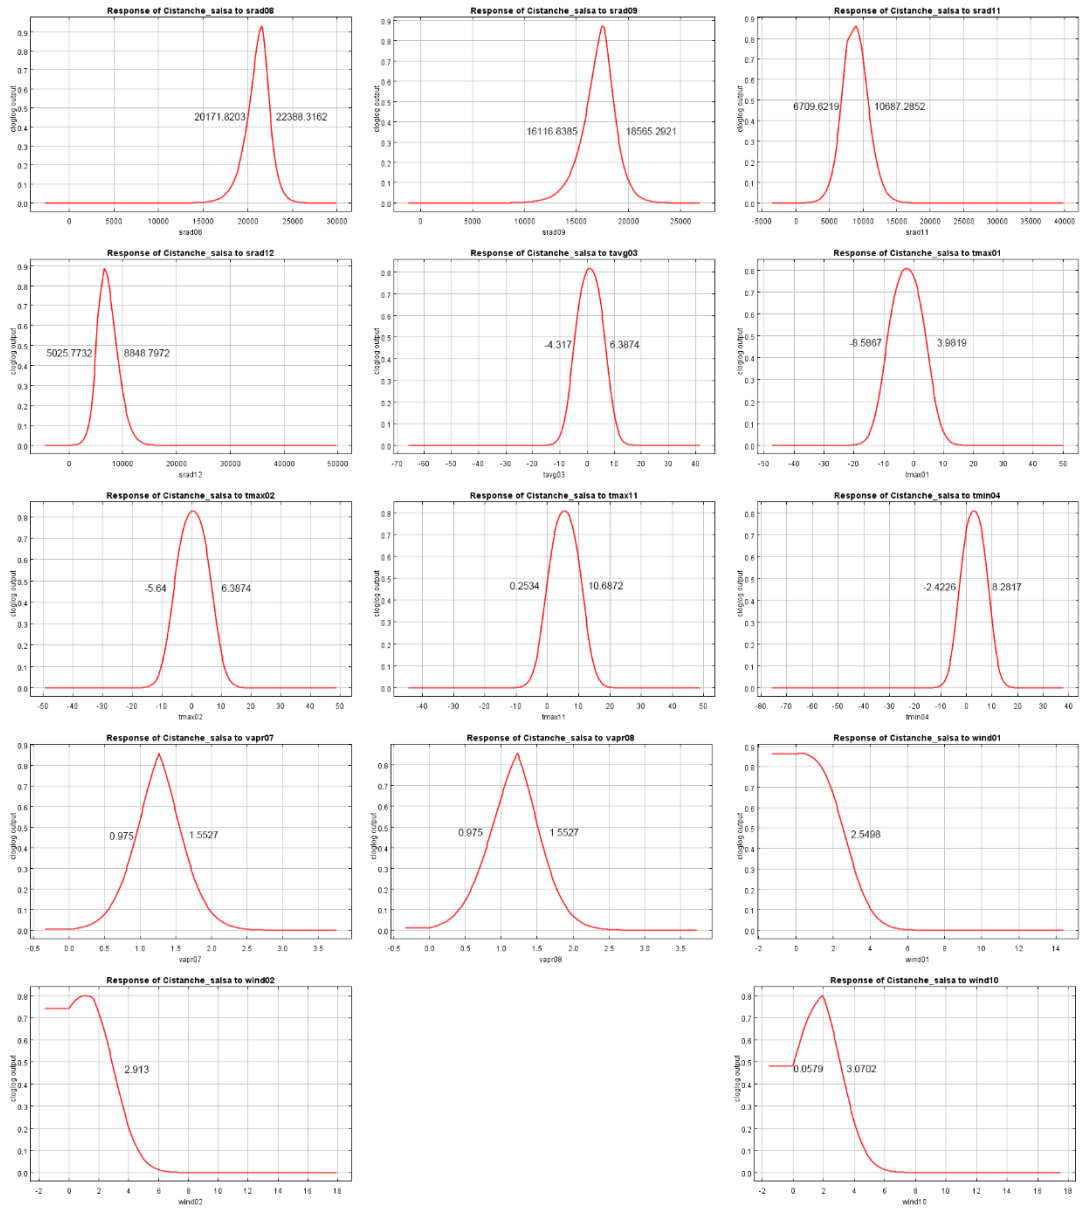

Figure S8 Variables' response results to suitability for *C. sinensis*.

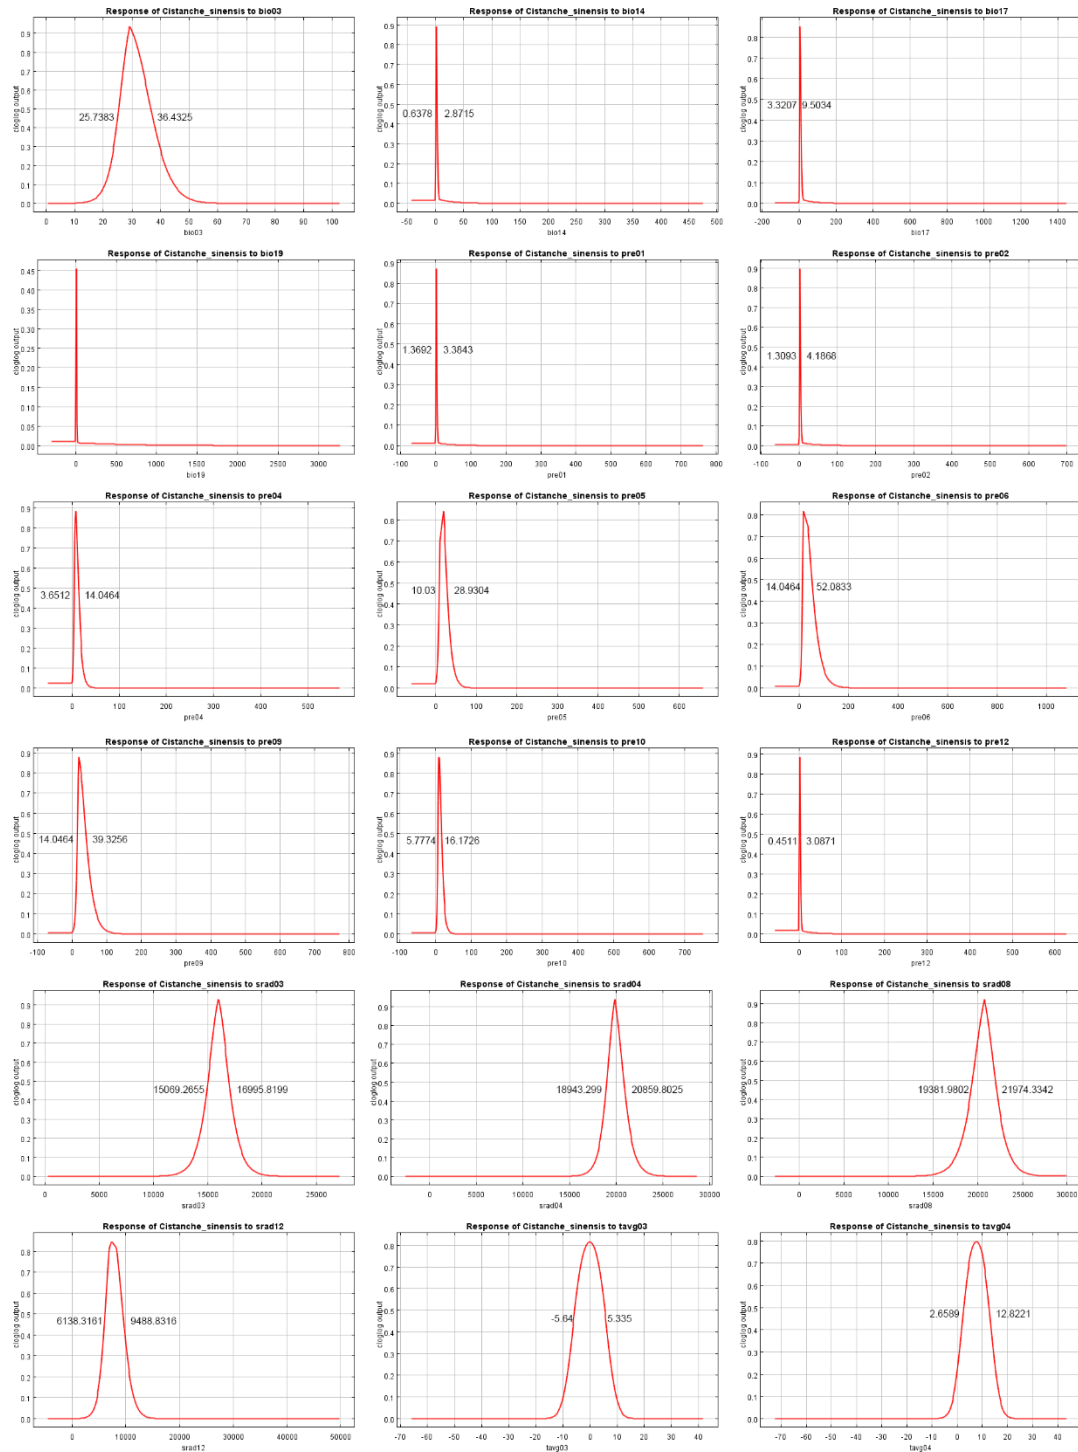



Figure S8 Continued...

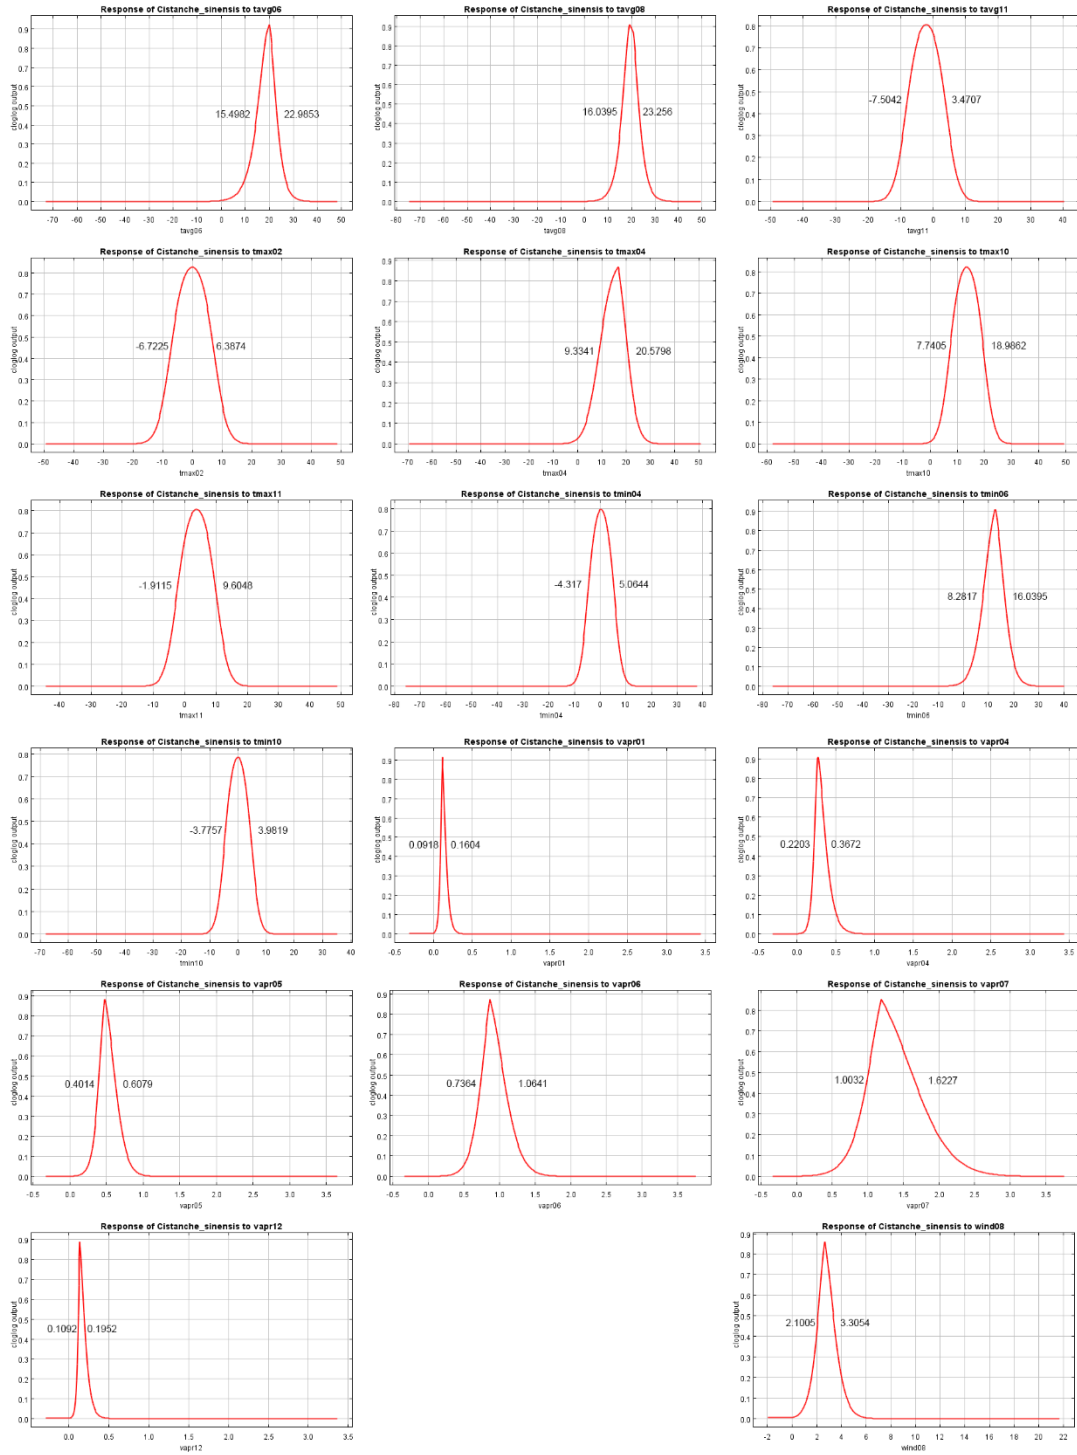

Supplement: 41598_2019_56379_MOESM1_ESM.pdf [file 41598_2019_56379_MOESM1_ESM.pdf]
